# Supplementary material for: Quantitative global proteome and phosphorylome analyses reveal potential biomarkers in kidney cancer
Source: PubMed Central journal article supplement — Oncol Rep. 2021 Sep 15;46(5):237. doi: 10.3892/or.2021.8188 (PMC8453689; doi:10.3892/or.2021.8188), 2021-09-15
Supplement: Supplementary_Data.pdf [file Supplementary_Data.pdf]

Table SI. Patient information.

| Patient   | Sex    | Age (years) | Tumor stage |
|-----------|--------|-------------|-------------|
| Patient 1 | Male   | 60          | II          |
| Patient 2 | Female | 56          | I           |
| Patient 3 | Female | 45          | I           |
| Patient 4 | Male   | 43          | I           |
| Patient 5 | Male   | 67          | II          |
| Patient 6 | Female | 60          | II          |
| Patient 7 | Female | 56          | III         |
| Patient 8 | Male   | 49          | I           |
| Patient 9 | Male   | 47          | II          |
